# Supplementary material for: Energetic costs of ectoparasite infection in Atlantic salmon
Source: Oxford University Press journal article supplement (doi:10.1242/jeb.243300), 2021-12-21
Supplement: jeb243300supp.pdf [file jeb243300supp.pdf]

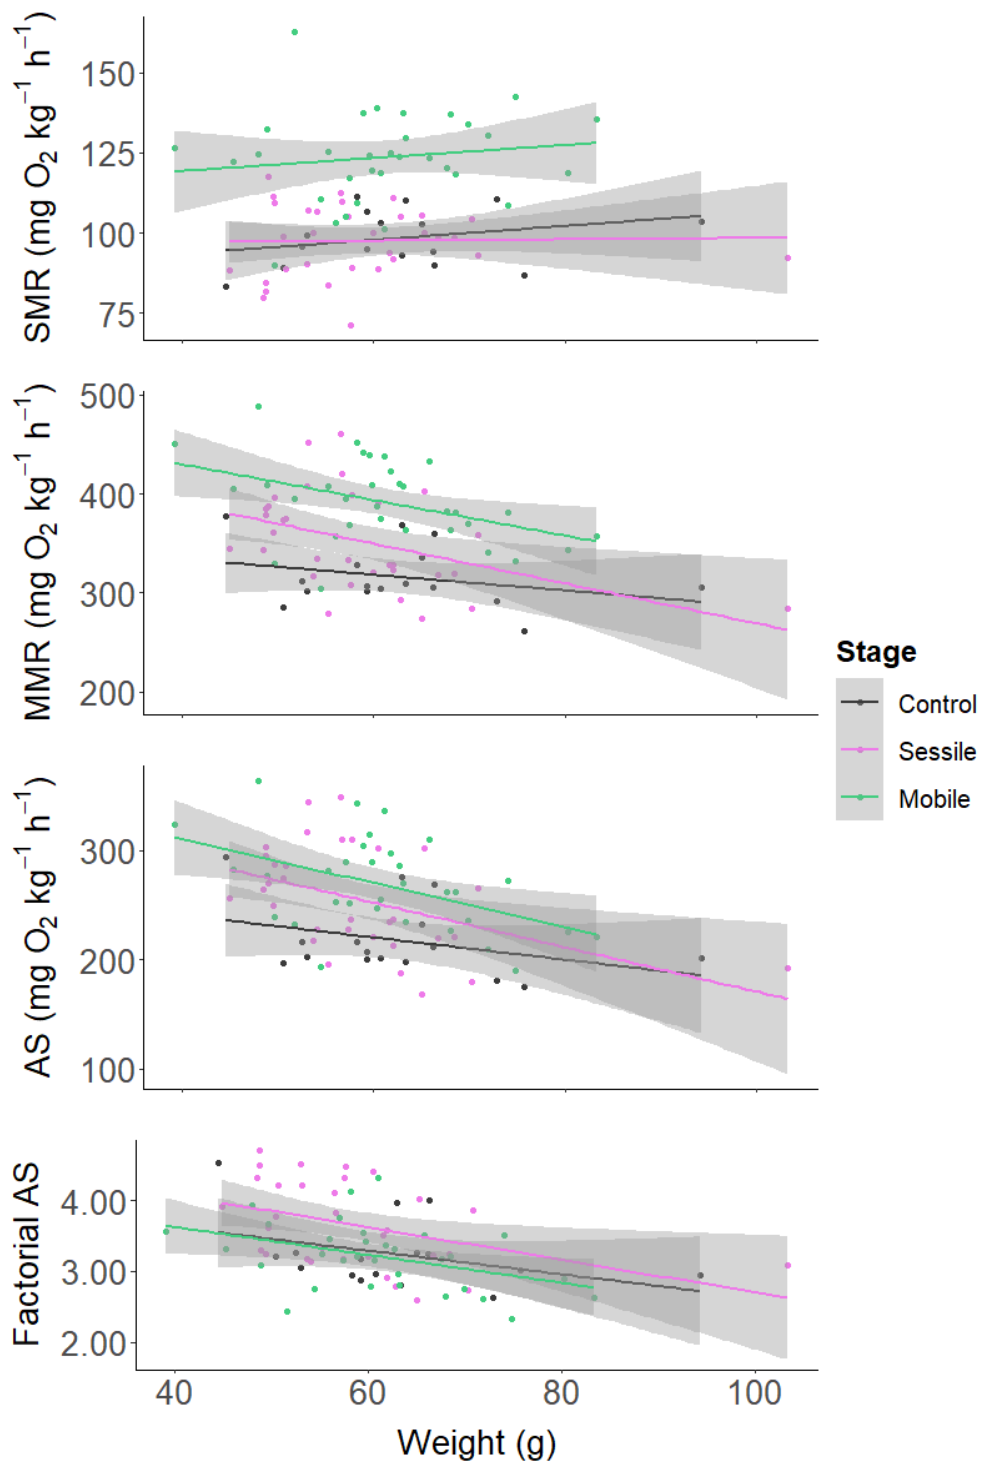

**Fig. S1. Metabolic rates as a function of fish weight, across control and lice-infected groups (with sessile or mobile lice stages).** The linear mixed effect model for standard metabolic rate (SMR) did not include fish weight as a factor, while maximum metabolic rate (MMR), aerobic scope (AS) and factorial aerobic scope were significantly influenced by weight. Linear regressions are shown for each group, with shaded areas indicating 95% confidence intervals.
